# Supplementary material for: Advances and Perspectives in Computer-Assisted Structure Elucidation: A Review
Source: Royal Society of Chemistry journal article supplement (doi:10.1039/d5dd00438a), 2025-01-01
Supplement: d5dd00438a1.zip [file CASE_TableS1_R1.xlsx]

## Sheet: Table S1
Year	Tool	Basic principle/Advantages	Disadvantages	Programming Language	Successor (if any)	References	Authors
1964 (DENDRAL launch)	CONGEN (DENDRAL)	• assembly method • adjacency matrix generator • based on Lederberg's vertex graph formulation • based on concept of superatoms • computational core STRGEN	• does not consider all possible overlaps • alternative substructures have to be considered as seperate problems • only considers constitutional, not stereoisomers • not user-friendly (rarely used)	LISP	CONGEN-II, GENOA	http://web.mit.edu/6.034/www/6.s966/dendral-history.pdf https://digirepo.nlm.nih.gov/ext/document/101584906X921/PDF/101584906X921.pdf https://www.softwarepreservation.org/projects/AI/DENDRAL/DENDRAL-CONGEN_GENOA.zip/view	Ray Carhart, Jim Nourse, Dennis Smith
ca. 1970 (first paper not found)	CHEMICS(-F)	• assembly method • structural group analysis (SGA) based on boolean algebra • analyses structures in terms of a predefined set of multiatom non-overlapping substructural fragments • creates different component sets (vectors) ranked from primary to tertiary based on their complexity • CHEMICS-F addition for file searching/ spectra comparison	• tool no longer accessible • only uses standard components (if fragments are not in system, structures will not be generated) • wrong assumption that by symmetry tests of intermediate structures and isomorphism checking (connectivity stack method) no duplicates will be generated	NA	NA	https://doi.org/10.2116/bunsekikagaku.24.437 https://doi.org/10.1021/ci950152r https://doi.org/10.1021%2FCI60016A007	Hidetsugu Abe, Shin-ichi Sasaki, et al.
1976	MASS	• assembly method • mathematical synthesis and analysis of molecular structures • adjacency matrix generator (atom valences input) • constructive search algorithm • branch and bound method • refines DENDRAL algorithm • low memory consumption	• high computation time • physical properties, e.g. geometry not considered • tool no longer accessible	FORTRAN	SMOG	https://doi.org/10.1016/0022-2860(76)80018-X	V.V. Serov, M.E. Elyashberg, L.A. Gribov
1981	GENOA (DENDRAL)	• assembly method • constructive substructure search-based algorithm (uses forbidden substructure constraints) • can deal wih structural overlaps • based on a generalization of standard graph matching techniques	• testing for forbidden substructures increases execution time • not user-friendly (rarely used)	LISP	NA	https://doi.org/10.1021%2FJO00321A037 https://www.softwarepreservation.org/projects/AI/DENDRAL/DENDRAL-CONGEN_GENOA.zip/view	Raymond E. Carhart, Dennis H. Smith, Neil A. B. Gray, James G. Nourse, Carl Djerassi
1981	ASSEMBLE	• assembly method • generation from fragments and exclusion rules, relies on input • ues forbidden substructure constraints, assembles with overlaps • incorporates "neighbouring atom tag" to manage overlapping substructures • purely mathematical algorithm without spectral data interpretation; spectral data used for scoring	• spectral interpretation left to user • testing for forbidden substructures increases execution time	NA	Assemble 2.0	https://doi.org/10.1016/S0003-2670(01)95416-9 https://www.upstream.ch/main.html	Craig A. Shelley, Morton E. Munk
1985	ACCESS	• selects among list of uniform alternative substructures for each peak • offers options to observe the progress of structure generation and to guide the program	• tool no longer accessible	NA	NA	https://doi.org/10.1002/mrc.1260231208 https://doi.org/10.1002/anie.198802471	W. Bremser, W. Fachinger
1986	DARC-EPOIS	• uses list of uniform alternative substructures for each peak, selects among these	• cannot use forbidden/required substructure constraints • tool no longer accessible	NA	NA	Dubois, J. E.; Carabedian, M.; Ancian, B. Elucidation structurale, automatique par RMN du carbone 13: Me´thode DARC-EPIOS. https://doi.org/10.1021/ci00054a007	Jacques-Emile Dubois, M. Carabedian, B. Ancian
1988	COCOA	• reduction method • recursive bond-removal method for structure generation • atom-centered generated fragments, optimizing storage • only list of first neighbours is stored for each atom instead of entire structures • can use required, potentially overlapping substructures	• massive size of hypergraphs • proportional increase in the run time • tool no longer accessible	Pascal, FORTRAN	GEN, HOUDINI	https://doi.org/10.1021/ci00058a009	Bradle D. Christie, Morton E. Munk
1990	AEGIS	• list-processing generator of EXSPEC program • structural fragments can be imposed as constraints to prevent generation of unwanted isomers • outperforms CHEMICS	• realitvely slow due to PROLOG • tool no longer accessible	PROLOG	NA	https://doi.org/10.1016%2F0169-7439%2890%2980131-O	H.J. Luinge, J.H. van der Maas
1990	MOLGEN	• orderly generation • uses non-overlapping fragments • capable of generating stereoisomers • maintained efficient generic structure generator • developed to overcome limitations of DENDRAL • application of computational group theory • generates structures without building all intermediates or duplicates • database independent	• mostly closed-source • newest version has longer run times	C	MOLGEN 3.5 MOLGEN 4 (MOLGEN-MS, MOLGEN-QSPR) MOLGEN 5	https://www.molgen.de/ https://doi.org/10.1016/S0003-2670(00)82078-4	A. Kerber, R. Laue, D. Moser
1991	LSD	• assembly method • reliability highly depends on the quality of input spectra • input relies on NMR carbon-proton correlation spectra • workflow: 1) bonds from correlations 2) bonds from pairs of incomplete atoms 3) final checking and structures output	• realitvely slow due to PROLOG • inefficient processing based on recursive generation-and-test algorithm • substructural information only used in final checking stage, not during resolution process	PROLOG	NA	https://nuzillard.github.io/LSD/index_ENG.html https://doi.org/10.1016/S0040-4020(01)80878-4 https://doi.org/10.1002/mrc.4612	J.-M. Nuzillard, G. Massiot
1995	GEN	• both structure assembly and reduction • useless connections are eliminated (creating forbidden structures) • substructures are assembled to build structures • does not accept overlaps of substructures • initial state is hyper structure	• no inclusion of experimental data • tool no longer accessible	Turbo Pascal	HOUDINI	https://doi.org/10.1021/ci00025a017	Simona Bohanec
1996	SMOG	• branch and bound method • uses modified graph-theoretical Faradjev algorithm • considers required and forbidden structural fragments, invariant substructures, aromatic structures • branch and bound method to test different structural hypotheses • generates structures with unusual oxidation states, formal charges, overlapping fragments	• operates too slow to be used as a 'conveyer-type' structure generator	C/C++	NA	http://ccl.net/cca/software/MS-DOS/SMOG https://doi.org/10.1021/ci950393z	M. S. Molchanova, V. V. Shcherbukhin, N. S. Zefirov
1996	LUCY	• deterministic method • exhaustive two-step structure generation process • all combinations of interpretations of signals are implemented in a connectivity matrix • deterministic generator fills in missing bond information • platform can generate structures with any arbitrary size of molecules	• molecular formulas > 30 heavy atoms are too time consuming for practical applications • tool no longer accessible	NA	SENECA	https://doi.org/10.1002%2FANIE.199619841	Christoph Steinbeck
1997	COCON	• relies on theoretical data sets for structure generation • developed for natural product chemists • user-friendly web application WEBCOCON • discusses constitutions compatible with given spectra • allows to quantify the value of connectivity information	• only for NMR spectra • relies on spectral quality	NA	NA	https://cocon.nmr.de/ https://doi.org/10.1007/s008940050052	Thomas Lindel, Jochen Junker, Matthias Köck
1997	X-PERT	• structures up to 30 ± 35 skeletal atoms • highly graphical representation of spectrum-structure information • knowledge base: set of libraries of molecular fragments and ranges of changes in their characteristic spectral features	• just for medium sized molecules • tool no longer accessible	NA	NA	https://doi.org/10.1016/S0003-2670(96)00391-1 https://doi.org/10.1016/S0003-2670(97)00229-8	M.E. Elyashberg, E.R. Martirosian, Yu.Z. Karasev, H. Thiele, H. Somberg
1999	StrucEluc (ACD Labs)	• deterministic expert system • common (without application of substructural fragments) or fragment mode (known fragments defined by user or in databases) • user friendly interface • based on the inputs of a series of spectral data • based on known algorithms (e.g. Chemics)	• closed source	NA	NA	https://www.acdlabs.com/products/spectrus-platform/structure-elucidator-suite/ https://doi.org/10.1002/mrc.1187 http://dx.doi.org/10.1007/978-3-662-46402-1 https://doi.org/10.1007/s002160100757 https://doi.org/10.1021/np0103315 https://doi.org/10.1016/S1381-141X(99)00002-7	K. A. Blinov, M. E. Elyashberg, S. G. Molodtsov, A. J. Williams, E. R. Martirosian
2000	Assemble 2.0	• generates all topological isomers compatible with input • systematically forms bonds and tests against constraints, deleting invalid bonds • utilizes non-overlapping substructures as initial atoms; overlapping substructures checked retrospectively • allows first-layer overlap of non-overlapping substructures, described by atom tags • with user interface	• only available for Windows 95, Windows 98, and Windows NT	NA	NA	https://doi.org/10.1016%2FS0169-7439%2800%2900056-3	Martin Badertscher, Andrew Korytko, Klaus-Peter Schulz, Mark Madison, Morton E. Munk, Pius Portmann, Martin Junghans, Patrick Fontana, Ernö Pretsch
2000	ESESOC	• integer partitioning method • decomposition of the molecular formula into fragments, components and segments • fragments used as building blocks • workflow: 1) examination of the 2D connection table of compound to identify all stereocenters 2) generation of automorphism group of structure graph 3) automorphism group used to remove the equivalent stereoisomers and generate candidate structures	• tool no longer accessible • very time-consuming for compounds with high symmetry	NA	NA	https://doi.org/10.1007%2FBF02969496	Hao Junfeng, Xu Lu, Hu Changyu
2001	SENECA	• uses two stochastic methods (simulated annealing and genetic algorithms) • workflow: 1) generation of random structure 2) calculation of energy to evaluate the structure and its spectral properties 3) transformation of structure into another structure until the optimum energy is reached	GitHub README: "Seneca in its current state is, and for the last 20 years was, what Barend Mons calls 'professorware' It is here for historical reasons and to document our work from 20 years ago. We acknowledge that it is for the brave early adopter, but we are working hard to get to stage where we can give a nice GUI app to true experimental chemists to load some NMR fresh from the spectrometer …	Java	NA	https://github.com/steinbeck/seneca https://doi.org/10.1021%2FCI000407N	Christoph Steinbeck
2003	HOUDINI	• improved GEN (reduction+assembly) • includes parallel alternative substructure representation • relies on 1) a square matrix of compounds representing all bonds in a hyper structure 2) substructure representation used to list atom-centred fragments • maps all the atom-centred fragments onto the hyper structure	• no inclusion of experimental data • tool no longer accessible	Pascal, FORTRAN	NA	https://doi.org/10.1021%2FCI034057R	A. Korytko, K.-P. Schulz, M. S. Madison, Morton E. Munk
2007	Fuzzy structure generation	• solves structural problems of NMR data containing an unknown number of nonstandard correlations (different, unknown lengths)	• very specific application	NA	NA	https://doi.org/10.1021/ci600528g	Mikhail E. Elyashberg, Kirill A. Blinov, Sergey G. Molodtsov, Antony J. Williams, Gary E. Martin
2012	OMG	• orderly generation • takes atoms and substructures as inputs and extends the structures using a breadth-first search method • tree extension terminates when all the branches reach saturated structures • based on canonical augmentation method NAUTY (McKay)	• no parallelisation • slower than other tools (storage of intermediate structures) • Windows is not supported	Java, C	PMG	https://sourceforge.net/p/openmg https://doi.org/10.1186/1758-2946-4-21	Julio E Peironcely, Miguel Rojas-Chertó, Davide Fichera, Theo Reijmers, Leon Coulier, Jean-Loup Faulon, Thomas Hankemeier
2013	MolSig	• orderly generation • tree approach • stochastic generator for canonical labelling and duplicate checks • relies on equivalence classes over atoms • one atom from each class is connected with other atoms • uses new algorithm to canonize molecular graphs using the signature molecular descriptor	• questionable maintenance (last commit 10 years ago)	C	NA	http://molsig.sourceforge.net/ https://doi.org/10.1021/ci300584r	Pablo Carbonell, Lars Carlsson, Jean-Loup Faulon
2013	PMG	• parallelized version of OMG	• slower than e.g. MOLGEN	Java	NA	https://sourceforge.net/projects/pmgcoordination https://doi.org/10.1016%2FJ.ENTCS.2013.11.005	Mohammad Mahdi Jaghoori, Sung-Shik T.Q. Jongmans, Frank de Boer, Julio Peironcely, Jean-Loup Faulon, Theo Reijmers, Thomas Hankemeier
2017	MassChemSite	• m/z values from input MSMS are queried in a database of fragments of compounds (built from user compounds, or previously built and provided) • set of candidate compounds is built by rational combination of fragments found in database • all candidates are fragmented and compared with peaks of the input MSMS spectra • NMR spectra compared to MS candidates to find match	• closed source	NA	NA	https://www.moldiscovery.com/software/masschemsite/ https://mass-analytica.com/towards-an-automatic-structure-elucidation-process-in-various-chemical-workflows-by-lc-hrms-and-nmr-data-analysis/	Molecular Discovery, Ltd. UK
2017	SMART	• first combination of NUS 2D NMR and deep CNNs • streamlines dereplication and determination of natural product families • accuracy grows as test set grows	• appears closed source • influence of solvent effects to be determined • accuracy of recognition correlating to S/N ratio to be determined	Python	DeepSAT	https://www.nature.com/articles/s41598-017-13923-x	Zhang, Idelbayev, Roberts, Tao, Nannapaneni, Duggan, Min, Lin, E Gerwick, Cottrell, W Gerwick
2021	MAYGEN	• orderly generation • focus on constitutional isomers • builds canonical graphs already during generation step • workflow: 1) distribution of hydrogens 2) block-wise generation of structures 3) canonical test to avoid duplicates	• slower than e.g. MOLGEN • no parallelization • 15-20 heavy atom limit • no possibility to add substructures (goodlists/badlists)	Java	SURGE	https://doi.org/10.1186/s13321-021-00529-9 https://github.com/MehmetAzizYirik/MAYGEN	Mehmet Aziz Yirik, Maria Sorokina, Christoph Steinbeck
2021	Scharnica	• spectroscopist-driven structure elucidation •database independent • bottom-up approach to build molecular structures from small spectral fragments • analytical combinatorial approach with graph search to determine fragment connectivity based on NMR • lists and visualizes ranked compound candidates using the WolframAlpha computational engine within the interface	• source code not found • works just for simple organic structures	NA	NA	http://schmarnica.si/new https://doi.org/10.1021/acs.jcim.0c01332	Matevž Pesek, Andraž Juvan, Jure Jakoš, Janez Košmrlj, Matija Marolt, Martin Gazvoda
2021	MassGenie	• incorporates 1) an in-silico database consisting of AI-generated EI mass spectra for the 100 million structures in the PubChem database 2) support AI that predicts the presence and absence of common substructures	• rules for in silico fragmentations need to be refined • knowledge on isotope patterns missing • negative ionisation spectra, larger molecules and molecules with P and S have to be trained • using canonical SMILES ignores stereoisomorphism	PyTorch	NA	https://doi.org/10.3390%2Fbiom11121793	Aditya Divyakant Shrivastava, Neil Swainston, Soumitra Samanta, Ivayla Roberts, Marina Wright Muelas
2022	SURGE	• based on canconical generation path method • uses NAUTY (McKay) package to compute automorphism groups of graphs as well as canonical labels • user can add custum filters • outperforms MOLGEN 5.0 • extensible/adaptable to application	• complicated use for Windows users • last update 3 years ago	C	NA	https://structuregenerator.github.io/ https://doi.org/10.1186/s13321-022-00604-9	Brendan D. McKay, Mehmet Aziz Yirik, Christoph Steinbeck
2022	MSNovelist	• de novo structure generation from MS2 spectra • based on structural fingerprints (CSI:FingerID) • instead of database search an RNN generative model is used to generate structures • implementation in SIRIUS	• strongly dependend on SIRIUS (GitHub README: "At the moment the CSI:FingerID service backing MSNovelist is down. We will need to retrain the model for the new service version, which will unfortunately take a while") • MS2 data must be present in high quality/ fragment ion rich • only trained for positive mode data • best suited for low m/z values • difficulties to use currently due to updates	Python	NA	https://github.com/meowcat/MSNovelist https://doi.org/10.1038/s41592-022-01486-3	Michael A. Stravs, Kai Dührkop, Sebastian Böcker, Nicola Zamboni
2023	Mass2SMILES	• deep learning model: 1) quickly predict structures as SMILES strings 2) includes the presence of 60 functional groups 3) the adduct type as well as to give an estimation of the number of different atoms in a given molecule	• not published yet • no inclusion of experimental data • requires NIST license • using canonical SMILES ignores stereoisomorphism	Python	NA	https://github.com/volvox292/mass2smiles https://doi.org/10.1101/2023.07.06.547963	David Elser, Florian Huber, Emmanuel Gaquerel
2023	DeepSAT	• neural network-based structure annotation and scaffold prediction system • directly extracts the chemical features associated with molecular structures from NMR spectra • outperforms existing methods	• last update > 4 years ago (not maintained?) • prototype with limited testing • training and updates resource intensive	Python	NA	https://github.com/mwang87/DeepSAT https://doi.org/10.1186/s13321-023-00738-4	Kim, Zhang, Reher, Wang, Alexander, Nothias, Han, Shin, KY Lee, KH Lee, Kim, Dorrestein, Gerwick, Cottrell
